# Supplementary material for: A lectin receptor kinase as a potential sensor for extracellular nicotinamide adenine dinucleotide in Arabidopsis thaliana
Source: eLife. 2017 Jul 19;6:e25474. doi: 10.7554/eLife.25474 (PMC5560858; doi:10.7554/eLife.25474)
Supplement: Figure 2—source data 1. — DOI: http://dx.doi.org/10.7554/eLife.25474.005 [file elife-25474-fig2-data1.xlsx]

## Sheet: Sheet1
Figure 2A: 2^[Ct(UBQ5)-Ct(PR1)]
	H2O-1	H2O-2	H2O-3	NAD+-1	NAD+-2	NAD+-3
WT	0.160428	0.123279	0.174343	0.707107	0.632878	0.532185
lecrk-I.8-2	0.108067	0.127627	0.147624	0.236514	0.170755	0.277392
lecrk-I.8-3	0.157127	0.108067	0.164938	0.173139	0.283221	0.34151
lecrk-I.8-4	0.176777	0.133046	0.11744	0.381565	0.307786	0.233258
dorn1-3	0.153893	0.178006	0.11908	0.870551	1.16473	0.721965
Figure 2B: 2^[Ct(UBQ5)-Ct(PR2)]
	H2O-1	H2O-2	H2O-3	NAD+-1	NAD+-2	NAD+-3
WT	0.25	0.29937	0.258816	0.692555	0.63728	0.517633
lecrk-I.8-2	0.20166	0.243164	0.198884	0.220676	0.303549	0.343886
lecrk-I.8-3	0.140632	0.236514	0.287175	0.303549	0.353553	0.241484
lecrk-I.8-4	0.239816	0.185565	0.213159	0.473029	0.48971	0.289172
dorn1-3	0.164938	0.258816	0.217638	0.939523	0.784584	1.05702
Figure 2C: 2^[Ct(UBQ5)-Ct(PR5)]
	H2O-1	H2O-2	H2O-3	NAD+-1	NAD+-2	NAD+-3
WT	0.131215	0.112656	0.208772	0.325335	0.493116	0.435275
lecrk-I.8-2	0.143587	0.189465	0.120742	0.222211	0.25349	0.163799
lecrk-I.8-3	0.181747	0.151774	0.108067	0.291183	0.216134	0.211686
lecrk-I.8-4	0.166086	0.119908	0.120742	0.22688	0.444421	0.34151
dorn1-3	0.115823	0.179244	0.124137	0.732043	0.773783	0.550953
Figure 2D: log10 cfu/leaf disc
	H2O-1	H2O-2	H2O-3	H2O-4	H2O-5	H2O-6	H2O-7	H2O-8	NAD+-1	NAD+-2	NAD+-3	NAD+-4	NAD+-5	NAD+-6	NAD+-7	NAD+-8
WT	7	7.02	6.91	6.92	6.66	6.93	6.77	6.91	5.16	5.35	5.68	3.91	5.47	5.54	5.16	5.58
lecrk-I.8-2	6.83	6.96	7.05	7.02	7	6.88	6.97	7.08	6.39	6.55	6.41	6.84	6.66	6.59	6.62	6.43
lecrk-I.8-3	7.09	6.93	7.06	6.61	6.66	6.88	6.98	7.02	5.78	6.11	6.38	5.5	6.55	5.31	6.74	6.78
lecrk-I.8-4	6.98	6.83	6.97	7.1	6.71	6.78	6.98	6.89	5.45	6.47	5.17	6.31	5.57	6.13	5.81	6.69
dorn1-3	6.86	7.1	6.74	6.81	6.59	7.06	6.84	7.08	5.54	5.16	5.63	5.17	5.56	5.33	5.53	5.08
Figure 2E: 2^[Ct(UBQ5)-Ct(LecRK-I.8)]
	Sample 1	Sample 2	Sample 3
WT	0.0883884	0.0656073	0.0693481
35S:LecRK-I.8#1	0.192109	0.132127	0.238159
35S:LecRK-I.8#2	0.146604	0.186856	0.234881
Figure 2F: 2^[Ct(UBQ5)-Ct(PR1)]
	H2O-1	H2O-2	H2O-3	NAD+-1	NAD+-2	NAD+-3
WT	0.095391	0.077482	0.087778	0.289172	0.19751	0.219151
35S:LecRK-I.8#1	0.101532	0.14161	0.087171	0.659754	0.510506	0.411795
35S:LecRK-I.8#2	0.057114	0.086569	0.112656	0.582367	0.655197	0.417544
Figure 2G: 2^[Ct(UBQ5)-Ct(PR5)]
	H2O-1	H2O-2	H2O-3	NAD+-1	NAD+-2	NAD+-3
WT	0.179244	0.148651	0.178006	0.346277	0.211686	0.29937
35S:LecRK-I.8#1	0.167241	0.204476	0.105843	0.578344	0.403321	0.469761
35S:LecRK-I.8#2	0.121582	0.150726	0.183011	0.423373	0.655197	0.566442
