# Supplementary material for: A lectin receptor kinase as a potential sensor for extracellular nicotinamide adenine dinucleotide in Arabidopsis thaliana
Source: eLife. 2017 Jul 19;6:e25474. doi: 10.7554/eLife.25474 (PMC5560858; doi:10.7554/eLife.25474)
Supplement: Figure 5—source data 1. — DOI: http://dx.doi.org/10.7554/eLife.25474.013 [file elife-25474-fig5-data1.xlsx]

## Sheet: Sheet1
Figure 5A: specific binding
	Sample 1	Sample 2	Sample 3
GFP	1117	1197	1477
eLecRK-I.8-GFP	5632	6539	5601
Figure 5B: specific binding
	Sample 1	Sample 2	Sample 3
-	2683	3341	5180
eLecRK-I.8-HA-His	52296	23243	42658
Figure 5C: specific binding
	Sample 1	Sample 2	Sample 3
MBP	115	92	211
MBP-eLecRK-I.8	3343	3190	2891
MBP-eDORN1	184	144	249
MBP-eLecRK-I.3	228	291	284
Figure 5D: specific binding
[32P]-NAD+ (nM)	0	50	200	500	1000
WT	0	1912	7079	11202	13291
35S:LecRK-I.8	0	8631	20130	24758	29365
lecrk-I.8-2	0	1046	2663	6051	7588
Figure 5E: specific binding
[32P]-NAD+ (nM	Sample 1	Sample 2	Sample 3
0	0	0	0
50	997	2415	1708
200	3812	5936	5194
500	8097	9261	9453
1000	9805	12968	11830
1500	10452	14045	13345
