# Supplementary material for: A lectin receptor kinase as a potential sensor for extracellular nicotinamide adenine dinucleotide in Arabidopsis thaliana
Source: eLife. 2017 Jul 19;6:e25474. doi: 10.7554/eLife.25474 (PMC5560858; doi:10.7554/eLife.25474)
Supplement: Figure 6—source data 1. — DOI: http://dx.doi.org/10.7554/eLife.25474.018 [file elife-25474-fig6-data1.xlsx]

## Sheet: Sheet1
Figure 6A: 2^[Ct(UBQ5)-Ct(PR1)]
NAD+
	H2O-1	H2O-2	H2O-3	NAD+-1	NAD+-2	NAD+-3
WT	0.128514	0.071794	0.102949	0.882703	1.07177	0.737135
lecrk-I.8-2	0.097396	0.099442	0.102238	0.266093	0.217638	0.371131
lecrk-I.8-3	0.108067	0.096723	0.098073	0.285191	0.521233	0.384219
lecrk-I.8-4	0.11344	0.074842	0.07911	0.262429	0.392292	0.429283
NADP+
	H2O-1	H2O-2	H2O-3	NADP+-1	NADP+-2	NADP+-3
WT	0.128514	0.071794	0.102949	0.747425	0.972655	0.641713
lecrk-I.8-2	0.097396	0.099442	0.102238	0.784584	0.503478	0.707107
lecrk-I.8-3	0.108067	0.096723	0.098073	0.607097	0.747425	0.812252
lecrk-I.8-4	0.11344	0.074842	0.07911	0.864537	0.76313	0.586417
Flg22
	H2O-1	H2O-2	H2O-3	Flg22-1	Flg22-2	Flg22-3
WT	0.128514	0.071794	0.102949	3.53081	6.23332	3.94493
lecrk-I.8-2	0.097396	0.099442	0.102238	3.78423	6.06287	5.42642
lecrk-I.8-3	0.108067	0.096723	0.098073	5.65685	4.22807	5.06303
lecrk-I.8-4	0.11344	0.074842	0.07911	4.14106	3.31728	4.22807
SA
	H2O-1	H2O-2	H2O-3	SA-1	SA-2	SA-3
WT	0.128514	0.071794	0.102949	6.23332	7.3615	9.38268
lecrk-I.8-2	0.097396	0.099442	0.102238	7.78124	8.57419	6.45313
lecrk-I.8-3	0.108067	0.096723	0.098073	8.45614	9.12611	7.26015
lecrk-I.8-4	0.11344	0.074842	0.07911	6.40856	5.85634	8.63383
Figure 6B: log10 cfu/leaf disc
NAD+
	H2O-1	H2O-2	H2O-3	H2O-4	H2O-5	H2O-6	H2O-7	H2O-8	NAD+-1	NAD+-2	NAD+-3	NAD+-4	NAD+-5	NAD+-6	NAD+-7	NAD+-8
WT	7	7.02	6.91	6.92	6.66	6.93	6.77	6.91	5.16	5.35	5.68	3.91	5.47	5.54	5.16	5.58
lecrk-I.8-2	6.83	6.96	7.05	7.02	7	6.88	6.97	7.08	6.39	6.55	6.41	6.84	6.66	6.59	6.62	6.43
lecrk-I.8-3	7.09	6.93	7.06	6.61	6.66	6.88	6.98	7.02	5.78	6.11	6.38	5.5	6.55	5.31	6.74	6.78
lecrk-I.8-4	6.98	6.83	6.97	7.1	6.71	6.78	6.98	6.89	5.45	6.47	5.17	6.31	5.57	6.13	5.81	6.69
NADP+
	H2O-1	H2O-2	H2O-3	H2O-4	H2O-5	H2O-6	H2O-7	H2O-8	NADP+-1	NADP+-2	NADP+-3	NADP+-4	NADP+-5	NADP+-6	NADP+-7	NADP+-8
WT	6.91	6.49	6.77	6.78	6.52	6.95	7.01	6.18	4.64	5.61	5.45	5.03	5.32	5.28	5.31	4.88
lecrk-I.8-2	6.95	7.05	6.23	7.02	6.74	7.04	6.59	6.75	5.68	4.88	5.47	5.33	4.72	5.45	5.45	5.28
lecrk-I.8-3	6.89	6.99	6.97	6.59	6.11	6.75	6.72	7.28	4.6	5.13	5.58	5.39	5.65	5.58	5.41	5.18
lecrk-I.8-4	6.32	7.03	6.52	7	6.97	6.87	6.02	6.93	5.09	5.11	5.31	5.09	5.21	4.72	5.75	5.71
Flg22
	H2O-1	H2O-2	H2O-3	H2O-4	H2O-5	H2O-6	H2O-7	H2O-8	Flg22-1	Flg22-2	Flg22-3	Flg22-4	Flg22-5	Flg22-6	Flg22-7	Flg22-8
WT	6.49	6.96	6.99	7.46	6.77	7.05	6.26	6.67	5.46	4.75	5.48	4.31	4.78	5.24	5.52	5.17
lecrk-I.8-2	7.38	7.53	7.58	7.43	7	6.8	7.01	6.56	6.39	4.83	5.21	5.05	5.29	5.43	5.29	5.16
lecrk-I.8-3	7.35	7.32	7.74	6.89	6.99	7.04	7	6.56	4.78	5.41	4.68	5.48	5.24	5.13	5.43	6.08
lecrk-I.8-4	7.38	7.46	7.35	7.38	6.43	6.96	6.91	6.84	6.13	4.72	5.43	4.96	4.88	4.94	5.28	5.23
SA
	H2O-1	H2O-2	H2O-3	H2O-4	H2O-5	H2O-6	H2O-7	H2O-8	SA-1	SA-2	SA-3	SA-4	SA-5	SA-6	SA-7	SA-8
WT	6.54	6.38	6.26	5.77	6.33	5.64	5.73	5.64	4.3	4.13	4.18	4.1	3.98	4.68	4.13	4.33
lecrk-I.8-2	6.71	6.18	6.46	6.43	6.32	5.8	6.53	6.56	4.38	4.38	4.46	3.53	4.18	4.81	4.75	4.43
lecrk-I.8-3	5.68	5.74	5.75	6.25	6.23	6.43	6.51	6.28	4.3	4.43	3.85	4.03	4.46	4.5	4.52	4.46
lecrk-I.8-4	6.32	5.73	6.52	5.7	6.43	6.08	6.02	6.23	4.75	4.41	3.66	4.33	4.46	4.25	3.58	4.55
Figure 6C: 2^[Ct(UBQ5)-Ct(PR1)]
	No treatment-1	No treatment-2	No treatment-3	Egg extracts-1	Egg extracts-2	Egg extracts-3
WT	0.082469	0.068393	0.077482	1.20581	1.50525	1.39474
lecrk-I.8-2	0.067452	0.051474	0.072293	0.243164	0.196146	0.116629
35S:CD38 #25-4	0.05954	0.052922	0.0819	0.594604	0.466516	0.384219
35S:CD38 #26-1	0.062935	0.075363	0.096723	0.45376	0.721965	0.539614
