# Supplementary material for: A lectin receptor kinase as a potential sensor for extracellular nicotinamide adenine dinucleotide in Arabidopsis thaliana
Source: eLife. 2017 Jul 19;6:e25474. doi: 10.7554/eLife.25474 (PMC5560858; doi:10.7554/eLife.25474)
Supplement: Figure 7—source data 1. — DOI: http://dx.doi.org/10.7554/eLife.25474.020 [file elife-25474-fig7-data1.xlsx]

## Sheet: Sheet1
Figure 7A: 2^[Ct(UBQ5)-Ct(PR)]
PR1
NAD+ (mM)	0-1	0-2	0-3	0.2-1	0.2-2	0.2-3	0.4-1	0.4-2	0.4-3	0.6-1	0.6-2	0.6-3
WT	0.104386	0.099442	0.116629	0.773782	0.535887	0.646176	1.02101	0.972655	0.790041	1.84038	2.18859	1.64718
lecrk-I.8-2	0.116629	0.071298	0.069348	0.219151	0.171943	0.279322	0.403321	0.539614	0.664343	1.37554	1.71713	2.28153
PR2
NAD+ (mM)	0-1	0-2	0-3	0.2-1	0.2-2	0.2-3	0.4-1	0.4-2	0.4-3	0.6-1	0.6-2	0.6-3
WT	0.178006	0.20733	0.180491	0.582367	0.659754	0.784584	1.17284	0.876606	1.48452	1.71713	1.89211	1.15669
lecrk-I.8-2	0.129408	0.105843	0.205898	0.234881	0.348686	0.205898	0.521233	0.251739	0.659754	1.84038	1.1487	1.28343
PR5
NAD+ (mM)	0-1	0-2	0-3	0.2-1	0.2-2	0.2-3	0.4-1	0.4-2	0.4-3	0.6-1	0.6-2	0.6-3
WT	0.127627	0.115823	0.161544	0.566442	0.460094	0.356013	0.63728	0.806642	0.479632	0.870551	1.21419	1.24833
lecrk-I.8-2	0.122427	0.102238	0.136787	0.210224	0.162668	0.244855	0.389582	0.244855	0.314253	0.913831	1.15669	0.895025
Figure 7B: log10 cfu/leaf disc
NAD+ (mM)	0-1	0-2	0-3	0-4	0-5	0-6	0-7	0-8	0.2-1	0.2-2	0.2-3	0.2-4	0.2-5	0.2-6	0.2-7	0.2-8	0.4-1	0.4-2	0.4-3	0.4-4	0.4-5	0.4-6	0.4-7	0.4-8	0.6-1	0.6-2	0.6-3	0.6-4	0.6-5	0.6-6	0.6-7	0.6-8
WT	6.39	6.32	5.94	6.11	6.11	6.2	6.08	6.41	4.6	5.11	5.35	5.06	4.46	5.13	4.98	4.88	4.33	4.42	4.38	4.81	4.96	5.23	5.08	5.02	4.26	4.38	4.96	5.09	5	4.31	4.88	4.78
lecrk-I.8-2	6.11	6.52	6.49	6.28	6.3	6.35	6.16	6.55	5.86	5.5	5.72	5.11	6.26	5.85	5.67	5.39	6.02	5.16	5.72	6.05	5.56	5.49	5.56	5.42	4.78	5.32	4.26	4.98	4.92	4.19	4.88	4.98
