# Supplementary material for: A lectin receptor kinase as a potential sensor for extracellular nicotinamide adenine dinucleotide in Arabidopsis thaliana
Source: eLife. 2017 Jul 19;6:e25474. doi: 10.7554/eLife.25474 (PMC5560858; doi:10.7554/eLife.25474)
Supplement: Figure 8—source data 1. — DOI: http://dx.doi.org/10.7554/eLife.25474.023 [file elife-25474-fig8-data1.xlsx]

## Sheet: Sheet1
Figure 8A: 2^[Ct(UBQ5)-Ct(PR1)]
	MgCl2-1	MgCl2-2	MgCl2-3	Psm-1	Psm-2	Psm-3
WT	0.180491	0.163799	0.157127	15.5625	16.4498	17.0299
lecrk-I.8-2	0.071794	0.101532	0.116629	12.5534	13.0864	11.2356
lecrk-I.8-3	0.112656	0.153893	0.184284	13.1775	11.7127	13.4543
lecrk-I.8-4	0.102238	0.130308	0.144586	15.3482	11.9588	14.42
dorn1-3	0.180491	0.163799	0.157127	15.5625	16.4498	17.0299
Figure 8B: log10 cfu/leaf disc
	Day 0-1	Day 0-2	Day 0-3	Day 0-4	Day 0-5	Day 0-6	Day 0-7	Day 0-8	Day 3-1	Day 3-2	Day 3-3	Day 3-4	Day 3-5	Day 3-6	Day 3-7	Day 3-8
WT	2.69	2.58	2.74	2.64	2.85	2.51	2.79	2.46	4.58	5.06	5.02	5.39	4.53	4.58	4.53	4.57
lecrk-I.8-2	2.85	2.51	2.67	2.36	2.56	2.61	2.79	2.43	6.16	5.02	5.84	5.62	5.79	5.85	5.81	5.7
lecrk-I.8-3	2.56	2.52	2.76	2.36	2.34	2.76	2.68	2.77	4.92	5.29	5.68	5.61	5.45	5.61	5.53	5.65
lecrk-I.8-4	2.72	2.69	2.63	2.88	2.63	2.59	2.79	2.84	4.98	5.52	5.49	4.49	5.09	5.51	5.21	5.26
dorn1-3	2.76	2.65	2.65	2.56	2.51	2.36	2.75	2.28	5.06	5.11	5.05	4.43	4.92	4.96	4.4	4.39
